# Supplementary material for: Plasma amyloid-β42/40 and apolipoprotein E for amyloid PET pre-screening in secondary prevention trials of Alzheimer’s disease
Source: PubMed Central journal article supplement (PMC10012324; doi:10.1093/braincomms/fcad015), 2023-01-24
Supplement: fcad015_supplementary_data.pdf [file fcad015_supplementary_data.pdf]

**Supplementary Material**

**Plasma A $\beta$ 42/A $\beta$ 40 and *APOE* for amyloid PET pre-screening in secondary prevention trials of Alzheimer's disease**

Nicholas C. Cullen<sup>1</sup>, Shorena Janelidze<sup>1</sup>, Erik Stomrud<sup>1,2</sup>, Randall J. Bateman<sup>3</sup>, Sebastian Palmqvist<sup>1,2</sup>, Oskar Hansson<sup>1,2,\*</sup>, Niklas Mattsson-Carlsson<sup>1,4,5,\*</sup>

<sup>1</sup>Clinical Memory Research Unit, Department of Clinical Sciences Malmö, Faculty of Medicine, Lund University, Lund, Sweden

<sup>2</sup>Memory Clinic, Skåne University Hospital, Malmö, Sweden

<sup>3</sup>Department of Neurology, Washington University School of Medicine, St. Louis, Missouri, U.S.A.

<sup>4</sup>Department of Neurology, Skåne University Hospital, Lund, Sweden

<sup>5</sup>Wallenberg Center for Molecular Medicine, Lund University, Lund, Sweden

\* Oskar Hansson and Niklas Mattsson-Carlsson contributed equally to this work.

### Supplementary Figure 1 – Pre-screening with plasma A $\beta$ 42/A $\beta$ 40 and APOE status only

This figure shows the effect of different thresholds for relative risk (i.e., predicted probability from a logistic regression model normalized across the study population) on trial recruitment.

Here, the logistic regression model to predict amyloid PET status included plasma A $\beta$ 42/A $\beta$ 40 and APOE status only, not age. Panel A shows the amyloid PET+ rate. Panel B shows the trade-off between the total number of tests (on log10 scale) needed in the pre-screening phase (i.e., plasma) versus the screening phase (i.e., PET) for a trial with 500 PET+ CU participants. Panel C shows the total cost savings by pre-screening across different cost ratios.

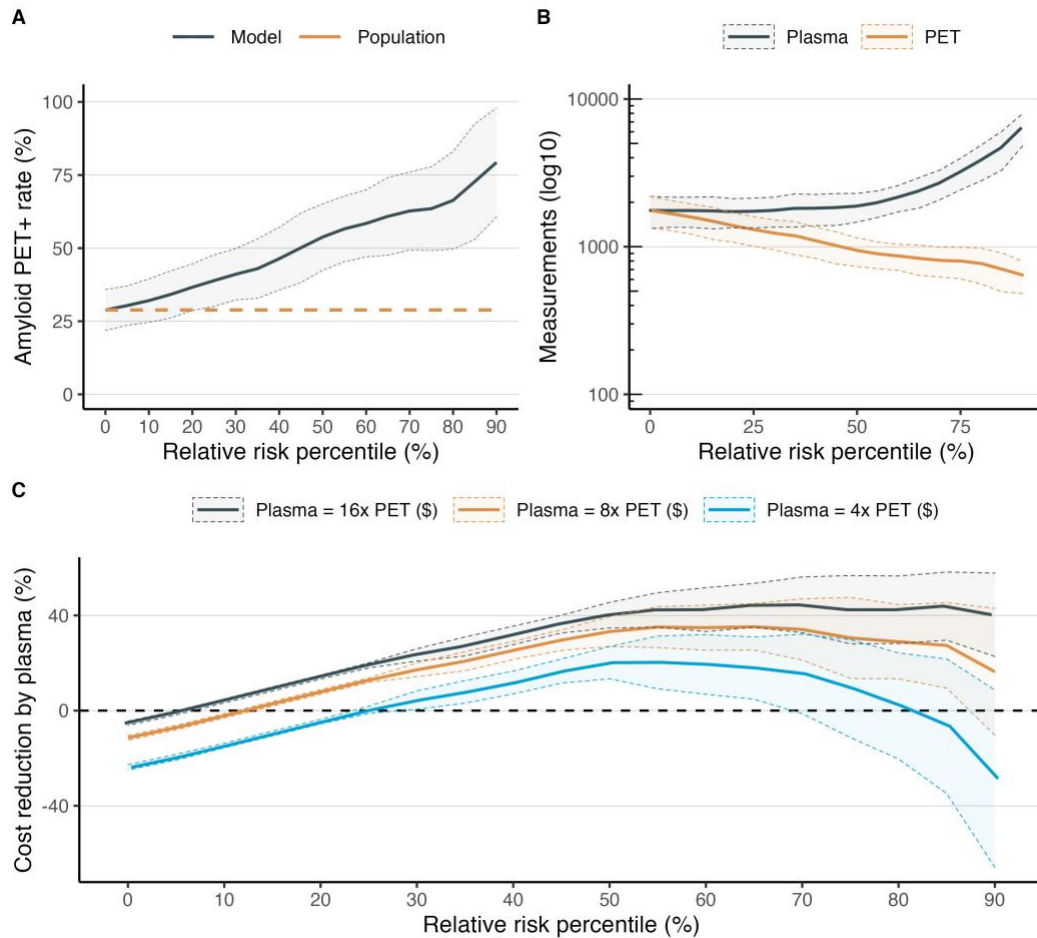

## Supplementary Text 1 – Example analysis code in R

This supplementary text contains example code to reproduce the logistic regression modelling and the screening analysis using the automated biomarker analysis (“aba”) package in the R programming language.

```
model <- df %>% aba_model() %>%  
  set_groups(everyone()) %>%  
  set_outcomes(AB.PET.STATUS,  
    .labels = c('Amyloid PET status')) %>%  
  set_predictors(  
    c(PLASMA_ABETA_bl, APOE, AGE_bl),  
    .labels = c('Plasma Aβ42/Aβ40 + APOE + Age')  
  ) %>%  
  set_stats(  
    stat_glm(std.beta=T)  
  ) %>%  
  fit()
```

```
model_summary <- model %>% aba_summary()
```

```
model_screen <- model %>%  
  aba_screen(  
    threshold = seq(0.0, 0.9, by = 0.05),  
    cost_multiplier = c(4, 8, 16),  
    include_n = 500,  
    ntrials = 10,  
    verbose = T,  
    risk_type = 'relative'  
  )
```
